## Correction

# Correction: Requirements for *Pseudomonas aeruginosa* Acute Burn and Chronic Surgical Wound Infection

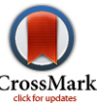

## The PLOS Genetics Staff

The Funding statement for this article is incorrect. The correct Funding statement is provided below:

**Funding:** This work was supported by grant W911NF-13-1-0199 from the US Army Research Office. KHT is a Cystic Fibrosis Foundation Postdoctoral Research Fellow. MW is a Burroughs Wellcome Investigator in the Pathogenesis of Infectious Disease. The funders had no role in study design, data collection and analysis, decision to publish, or preparation of the manuscript.

## Reference

1. Turner KH, Everett J, Trivedi U, Rumbaugh KP, Whiteley M (2014) Requirements for *Pseudomonas aeruginosa* Acute Burn and Chronic Surgical Wound Infection. PLoS Genet 10(7): e1004518. doi:10.1371/journal.pgen.1004518

---

**Citation:** The PLOS Genetics Staff (2014) Correction: Requirements for *Pseudomonas aeruginosa* Acute Burn and Chronic Surgical Wound Infection. PLoS Genet 10(10): e1004743. doi:10.1371/journal.pgen.1004743

**Published:** October 17, 2014

**Copyright:** © 2014 The PLOS Genetics Staff. This is an open-access article distributed under the terms of the Creative Commons Attribution License, which permits unrestricted use, distribution, and reproduction in any medium, provided the original author and source are credited.
